# Supplementary material
Source: PubMed Central journal article supplement (PMC3624522)
Supplement: JB.02273-12_zjb999092466so1.pdf [file JB.02273-12_zjb999092466so1.pdf]

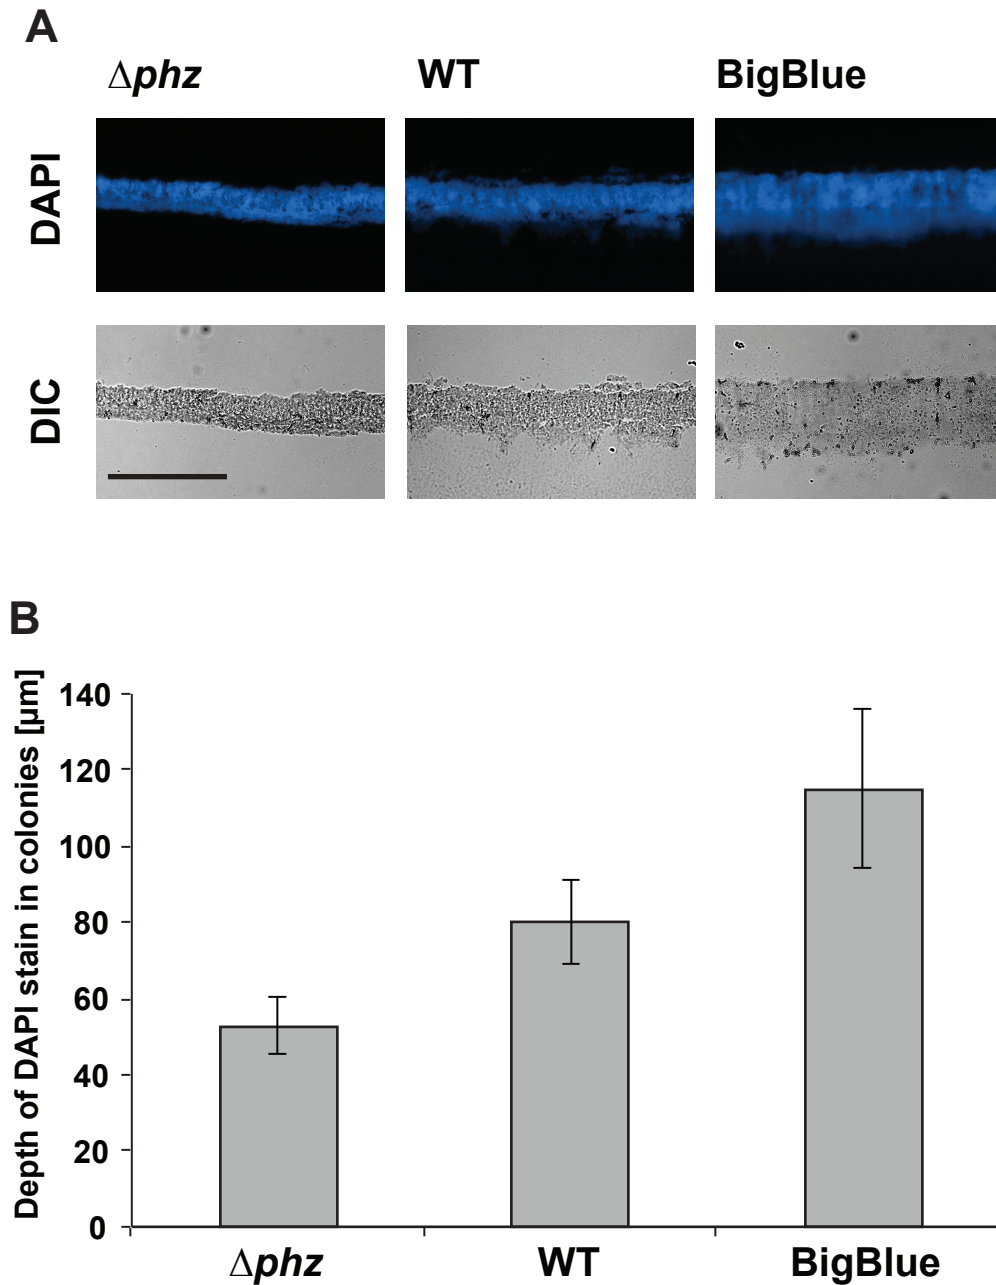

**Figure S1. The pyocyanin-overproducer BigBlue forms a thicker cell layer in colony biofilms than wild type.** BigBlue, wild type and  $\Delta phz$  colonies were grown for 3 days on 1% agar and 1% tryptone (supplemented with 40  $\mu\text{g}/\text{ml}$  Congo Red and 20  $\mu\text{g}/\text{ml}$  Coomassie Blue), then fixed and sectioned. Cells were visualized by DAPI staining (A). Scale bar is 200  $\mu\text{m}$ . Six sections from 3 different colonies each were measured (B). Error bars represent the standard deviation.

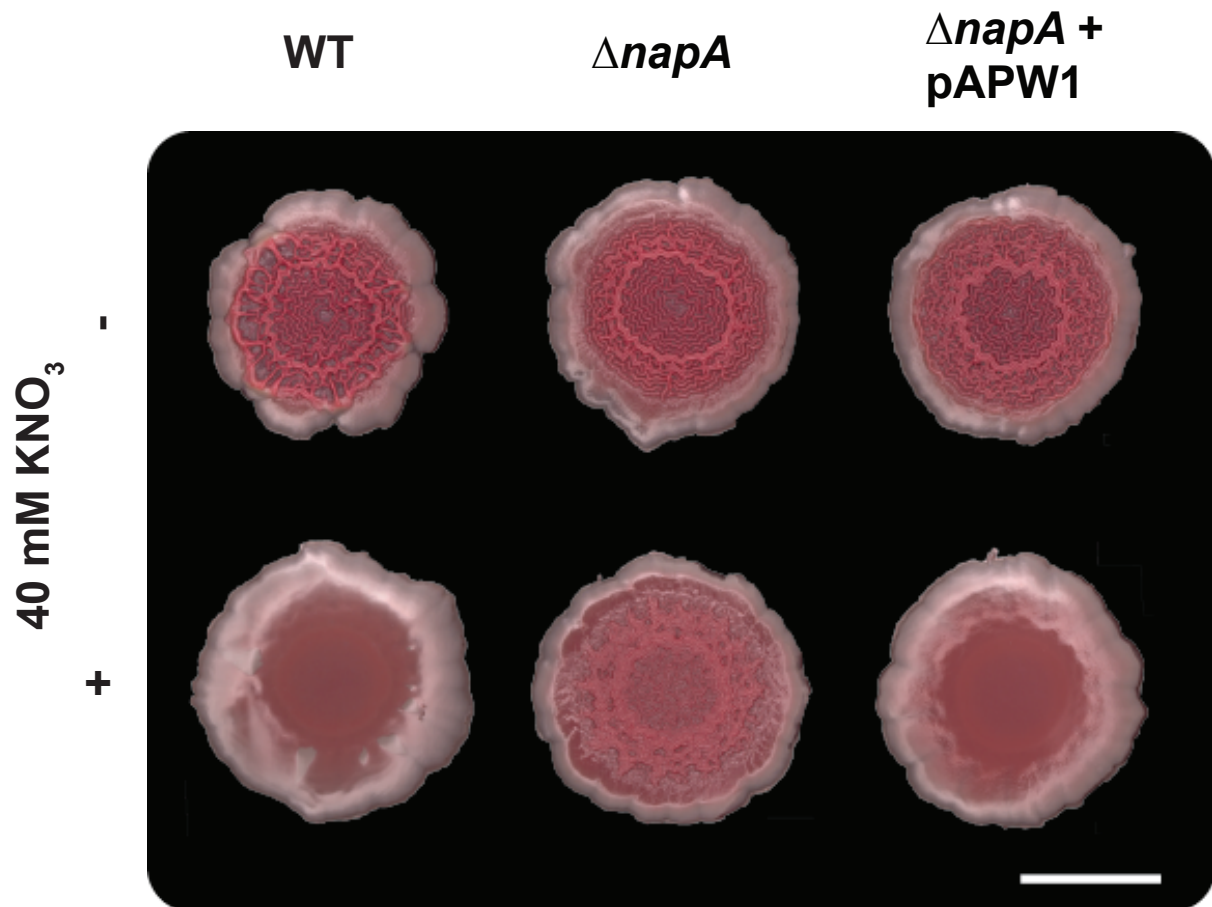

**Figure S2. Complementation of  $\Delta napA$ .** Colonies were grown for 3 days on 1% agar, 1% tryptone and 40 mM potassium nitrate (supplemented with 40  $\mu$ g/ml Congo Red and 20  $\mu$ g/ml Coomassie Blue). In contrast to the wrinkled colony phenotype of  $\Delta napA$ , cells complemented with the *nap* operon (pAPW1) exhibited a smooth colony morphotype. Scale bar is 1 cm.

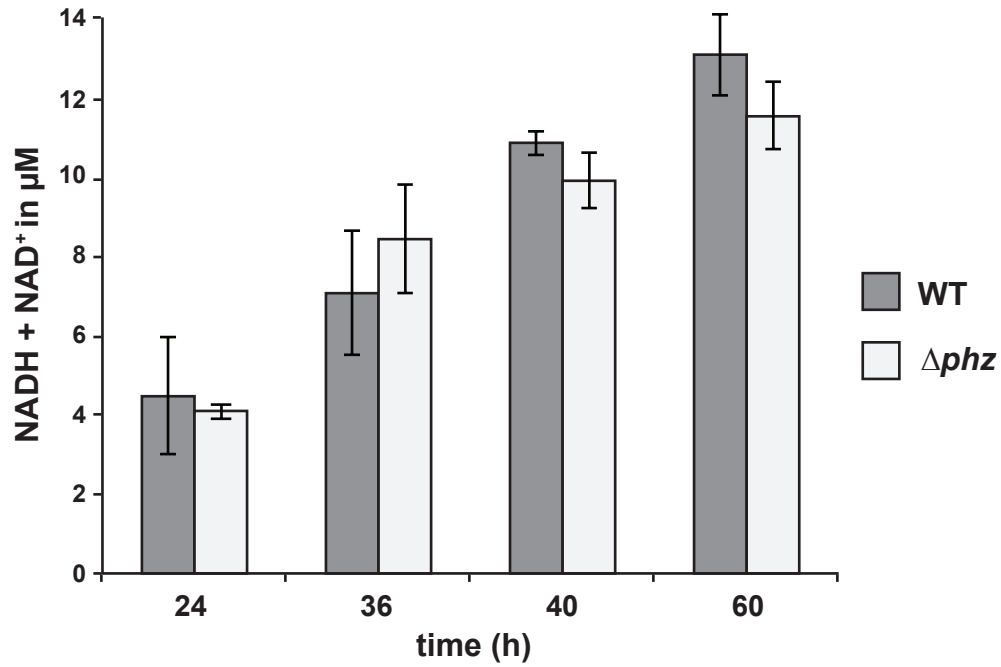

**Figure S3.** Total NAD(H) is comparable between wt and  $\Delta phz$  colonies. Colonies were harvested at indicated times and then resuspended in 1 ml of 1% tryptone buffer before extraction. Concentrations refer to the resuspension volume. These measurements accompany data presented in figure 4.
